1 **Skeletal muscle releases extracellular vesicles with distinct protein and**  
2 **miRNA signatures that accumulate and function within the muscle**  
3 **microenvironment**

4

5 Sho Watanabe<sup>a</sup>, Yuri Sudo<sup>a</sup>, Satoshi Kimura<sup>b</sup>, Kenji Tomita<sup>b</sup>, Makoto Noguchi<sup>c</sup>, Hidetoshi  
6 Sakurai<sup>d</sup>, Makoto Shimizu<sup>c</sup>, Yu Takahashi<sup>a</sup>, Ryuichiro Sato<sup>a,c,e</sup>, Yoshio Yamauchi<sup>a,c,e,\*</sup>

7

8 <sup>a</sup>Laboratory of Food Biochemistry, Department of Applied Biological Chemistry,  
9 Graduate School of Agricultural and Life Sciences, The University of Tokyo, Tokyo 113-  
10 8657, Japan

11 <sup>b</sup>Technology Advancement Center, Graduate School of Agricultural and Life Sciences,  
12 The University of Tokyo, Tokyo 113-8657, Japan

13 <sup>c</sup>Nutri-Life Science Laboratory, Department of Applied Biological Chemistry, Graduate  
14 School of Agricultural and Life Sciences, The University of Tokyo, Tokyo 113-8657,  
15 Japan

16 <sup>d</sup>Center for iPS Cell Research and Application (CiRA), Kyoto University, Kyoto 606-8507,  
17 Japan

18 <sup>e</sup>AMED-CREST, Japan Agency for Medical Research and Development, Tokyo 100-  
19 0004, Japan

20

21 \*Corresponding author

22 Yoshio Yamauchi, Ph.D.

23 Department of Applied Biological Chemistry,

24 Graduate School of Agricultural and Life Sciences,

25 University of Tokyo

26 1-1-1 Yayoi, Bunkyo, Tokyo 113-8657, Japan

27 Tel: 81-3-5841-5179

28 Email: [yoshio-yamauchi@g.ecc.u-tokyo.ac.jp](mailto:yoshio-yamauchi@g.ecc.u-tokyo.ac.jp)

29

30 **Author Contributions:** Y.Y. conceived the research. Y.Y. and S.W. designed  
31 experiments. S.W., Y.S., and Y.Y. performed experiments. S.K. and K.T. contributed to  
32 EM analysis. M.N. and H.S. contributed new tools. S.W., Y.S., Y.T., M.S., R.S., and Y.Y.  
33 analyzed data. Y.Y. and S.W. wrote the manuscript. R.S. edited the manuscript.

34 **Abstract**

35 Extracellular vesicles (EVs) contain various regulatory molecules and mediate  
36 intercellular communications. Although EVs are secreted from various cell types,  
37 including skeletal muscle cells, and present in the blood, their identity is poorly  
38 characterized *in vivo*, limiting the identification of their origin in the blood. Since the  
39 skeletal muscle is the largest organ in the body, it could substantially contribute to  
40 circulating EVs as their source. However, due to the lack of defined markers that  
41 distinguish SkM-EVs from others, whether the skeletal muscle releases EVs *in vivo* and  
42 how much the skeletal muscle-derived EVs (SkM-EVs) account for plasma EVs remain  
43 poorly understood. In this work, we perform quantitative proteomic analyses on EVs  
44 released from C2C12 cells and human iPS cell-derived myocytes and identify potential  
45 marker proteins that mark SkM-EVs. These markers we identified apply to *in vivo*  
46 tracking of SkM-EVs. The results show that skeletal muscle makes only a subtle  
47 contribution to plasma EVs as their source in both control and exercise conditions in  
48 mice. On the other hand, we demonstrate that SkM-EVs are concentrated in the skeletal  
49 muscle interstitium. Furthermore, we show that interstitium EVs are highly enriched with  
50 the muscle-specific miRNAs and repress the expression of the paired box transcription  
51 factor *Pax7*, a master regulator for myogenesis. Taken together, our findings reveal that  
52 the skeletal muscle releases exosome-like small EVs with distinct protein and miRNA  
53 profiles *in vivo* and that SkM-EVs mainly play a role within the muscle microenvironment  
54 where they accumulate.

55

56 **Keywords:** Extracellular vesicles, Exosome, Skeletal muscle, Interstitium

57

## 58 Introduction

59 The skeletal muscle is the largest organ in the body, accounting for 40% of body  
60 weight and is responsible for locomotion activity, whole-body metabolism, and energy  
61 homeostasis. Moreover, the skeletal muscle serves as a secretory organ (1, 2): it  
62 secretes various humoral factors known as myokines, including irisin, apelin,  
63 interleukins, and myostatin. They act as mediators for cell-cell communications in  
64 autocrine, paracrine, and endocrine fashions. Each myokine has distinct functions and  
65 influences tissue homeostasis and metabolism within the skeletal muscle and in other  
66 tissues (1, 2). Exercise can induce the expression and secretion of some myokines,  
67 which partly explains the health benefits of exercise (1, 3). Thus, the skeletal muscle is  
68 considered as an important secretory organ that governs whole-body homeostasis.

69 In addition to humoral factors, cells release membrane vesicles to the  
70 extracellular milieu. Over the last decade, much attention has been paid to the  
71 extracellular vesicles (EVs) because they accommodate a wide variety of bioactive  
72 molecules, including nucleic acids (DNA, mRNA, microRNA (miRNA), long noncoding  
73 RNA), proteins, lipids, and metabolites, and deliver them to recipient cells (4-8). Thus,  
74 EVs also act as a means for intercellular and interorgan communications in physiological  
75 and pathophysiological settings, including exercise, cancer, and metabolic diseases (9,  
76 10). EVs are heterogeneous in nature and classified into three classes based on size  
77 and biogenesis mechanisms, exosomes (50–150 nm in diameter), microvesicles (100–  
78 1,000 nm), and apoptotic bodies (100–5,000 nm) (4-6). Exosomes are derived from the  
79 multivesicular bodies (MVBs) of the late endosome. The MVBs fuse with the plasma  
80 membrane (PM) and intraluminal vesicles (ILVs) inside the MVBs are released to the  
81 extracellular environment as exosomes. Microvesicles are originated from the plasma  
82 membrane by membrane budding. Apoptotic bodies are released from apoptotic cells.  
83 EVs are abundantly present in body fluids, including plasma. It is thus expected that their  
84 constituents serve as useful biomarkers for diagnosis (9, 11). On the other hand, once  
85 they are released from original tissues and enter the circulation, it is nearly impossible to  
86 identify their origin because tissue-specific EV markers are poorly characterized. This  
87 issue makes it difficult to understand the contribution of each tissue to circulating EVs  
88 and to track certain EVs *in vivo*.

89 Like other cell types, skeletal muscle cells are capable of releasing EVs (12).  
90 Evidence shows that C2C12 murine myoblasts and myotubes, and human primary

91 myocytes secrete EVs (13-15). EVs released from C2C12 myotubes are transferred to  
92 myoblasts and regulate differentiation into myotubes by modulating gene expression  
93 (15). Furthermore, EVs derived from C2C12 myotubes contain miRNAs specifically or  
94 abundantly expressed in the skeletal muscle called myomiRs (16, 17) that regulate  
95 skeletal muscle homeostasis (18, 19). These results suggest that SkM-EVs have  
96 physiological functions. Proteomic approaches identified several muscle-specific proteins  
97 in C2C12-derived EVs (14, 15). However, their potential as protein markers for SkM-EVs  
98 *in vivo* has been poorly explored. Due to the lack of defined SkM-EV markers, whether  
99 the skeletal muscle actively releases EVs *in vivo*, how much proportion of plasma EVs  
100 are derived from this tissue, and where SkM-EVs are delivered and exert their roles  
101 remain largely unknown. In addition, although previous works show that exercise  
102 increases circulating EVs (20-22), it is under debate whether skeletal muscle contributes  
103 to the exercise-dependent increase in circulating EVs.

104 To address these issues, here we seek to identify SkM-EV marker proteins by  
105 quantitative proteomics on human and mouse myocyte-derived EVs and investigate  
106 whether skeletal muscle releases exosome-like small EVs *in vivo*. Based on our  
107 proteomic profiling of EVs released from these myocytes, we provide *in vivo* evidence  
108 that skeletal muscle actively releases small EVs with distinct protein and miRNA profiles  
109 and that SkM-EVs highly accumulate within the skeletal muscle interstitium rather than  
110 being secreted into the blood. We further show that EVs isolated from the muscle  
111 interstitium modulate myogenic gene expression in murine myoblasts. We thus propose  
112 that SkM-EVs mainly exert their functions within the muscle microenvironment.

113

## 114 **Results**

### 115 ***C2C12 cells and hiPSC-derived myocytes secrete EVs***

116 To characterize EVs secreted from both human and mouse skeletal muscle cells,  
117 we first isolated EVs from mouse C2C12 myoblasts and myotubes, and human iPSC-  
118 derived myocytes (hiPSC-myocytes) by a standard ultracentrifugation protocol (23).

119 C2C12 myoblasts were differentiated into myotubes (**Figure S1A**) and incubated for 48  
120 h in a differentiation medium containing EV-free horse serum (HS) before isolating EVs  
121 from the conditioned medium. To isolate C2C12 myoblast EVs, the cells were incubated  
122 for 48 h in an EV-free FBS medium. In addition, we used two lines of hiPSC-myocytes,  
123 414C2<sup>tet-MyoD</sup> and 409B2<sup>tet-MyoD</sup>. These hiPSC lines harbor tetracycline-inducible human

124 *MYOD1* expressing *piggyBac* vector, and thus adding doxycycline (Dox) into culture  
125 medium induces MyoD1 expression, initiating myogenic differentiation. Five–six days  
126 after Dox addition, these hiPSCs differentiated into myocytes expressing skeletal muscle  
127 cell marker proteins, including myosin heavy chain (MyHC), myogenin, and caveolin-3  
128 but no longer expressing the iPSC marker proteins Nanog, OCT-4A, and Sox 2 (**Figure**  
129 **S1B**). After differentiation, hiPSC-myocytes were incubated in a medium supplemented  
130 with EV-free HS for 48 h to isolate EVs from a conditioned medium. To observe the  
131 morphology of isolated EVs, we first performed transmission electron microscopy (TEM)  
132 analysis on EVs from C2C12 myoblasts (C2C12-MB-EVs), C2C12 myotubes (C2C12-  
133 MT-EVs), and hiPSC-myocytes (hiPS-MC-EVs). **Figures 1A** shows typical images of  
134 C2C12-MB-EVs, C2C12-MT-EVs, and hiPS-MC-EVs. The diameters of C2C12-MB-EVs  
135 and C2C12-MT-EVs were  $48.8 \pm 16.4$  nm and  $61.4 \pm 22.4$  nm, respectively (**Figure 1B**).  
136 C2C12-MT-EVs were statistically larger than C2C12-MB-EVs. The average size of hiPS-  
137 MC-EVs was approximately 58 nm in both 414C2<sup>tet-MyoD</sup> and 409B2<sup>tet-MyoD</sup> lines (**Figure**  
138 **1B**). The sizes are all within the range of typical exosomes. Together, these results  
139 showed that both human and mouse skeletal muscle cells release small EVs with similar  
140 morphology.

141 We next examined the presence of the exosome marker proteins in the isolated  
142 EVs. The results show that C2C12-MB-EVs and C2C12-MT-EVs contained the well-  
143 defined exosome markers, including Alix, TSG101, CD81, and HSP90 (**Figure 1C**).  
144 hiPS-MC-EVs also contained these exosome markers (**Figure 1D**). In addition to these  
145 typical markers, we found that C2C12-MT-EVs and hiPS-MC-EVs but not C2C12-MB-  
146 EVs, contained caveolin-3, a protein highly expressed in the skeletal muscle and  
147 cardiomyocytes, and its contents increased by differentiation. The results suggest that  
148 skeletal muscle cells release EVs harboring skeletal muscle-specific proteins.

149

### 150 ***Proteomic profiling of EVs released from skeletal muscle cells***

151 To determine proteomic profiling of EVs released by skeletal muscle cells, we  
152 first performed quantitative shotgun proteomic analyses on C2C12-MB-EVs and C2C12-  
153 MT-EVs. The analyses identified 957 and 1,006 proteins in C2C12-MB-EVs and C2C12  
154 MT-EVs, respectively, which cover 1,047 different proteins (**Figure 2A**). Previously,  
155 Forterre *et al.* identified 455 proteins as those found in EVs secreted from C2C12  
156 myoblasts and myotubes (15). Of the 455 proteins, 354 proteins (78%) were also found

157 in our results (**Figure S2**). The current results thus revealed 693 additional C2C12-  
158 MB/MT-EVs proteins not identified previously.

159 Next, the same proteomic analysis was performed on hiPS-MC-EVs from both  
160 414C2<sup>tet-Myo-D</sup> and 409B2<sup>tet-MyoD</sup> lines, and 651 proteins were detected (**Figure 2A**).  
161 Among these 651 proteins, the 586 proteins (90%) are covered by the EV database  
162 Vesiclepedia (24) (<http://microvesicles.org>), validating isolated EVs of quality (**Figure**  
163 **2A**). Five hundred forty-seven proteins (84%) out of the 651 were also found in EVs  
164 isolated from either C2C12-MB-EVs or C2C12-MT-EVs (**Figure 2A**). The results also  
165 identified 500 proteins that overlap among C2C12-MB-EVs, C2C12-MT-EVs, and hiPS-  
166 MC-EVs. Thirty-seven proteins (**Table S1**) were found in both C2C12-MT-EVs and  
167 hiPSM-EVs but not in C2C12-MB-EVs, suggesting a distinct protein profile of myotube-  
168 derived EVs. On the other hand, 31 proteins (**Table S2**) were found only in C2C12-MB-  
169 EVs.

170 To annotate identified EV proteins, we classified these proteins based on Gene  
171 Ontology (GO) using an integrative platform, DAVID (25, 26). The results showed that in  
172 hiPS-MC-EVs, C2C12-MB-EVs, and C2C12-MT-EVs, proteins belonging to the term  
173 “Extracellular Exosome” in “Cellular Components” were highly enriched, confirming that  
174 isolated EVs are of good quality (**Figure 2C**). For the “Biological processes” term,  
175 proteins classified into “Muscle contraction” were significantly enriched in all three EV  
176 samples, which indicates that SkM-EVs contain proteins unique to the skeletal muscle.  
177 Together, all these results suggest that SkM-EVs display a distinct protein signature.

178

### 179 ***Identification of potential marker proteins for SkM-EVs***

180 We next sought to identify potential marker proteins that mark EVs released from  
181 skeletal muscle cells. To this end, we searched proteins highly expressed in the skeletal  
182 muscle from our proteome data obtained from hiPS-MC-EVs and C2C12-MT-EVs. As  
183 mentioned above, we identified thirty-seven potential MT-EV proteins (**Figure 2A, Table**  
184 **S1**). To assess their specificity, we searched specific proteins using the Gene Ontology  
185 Consortium’s Community Annotation Wiki for Muscle Biology  
186 ([http://wiki.geneontology.org/index.php/Muscle\\_Biology](http://wiki.geneontology.org/index.php/Muscle_Biology)) and confirmed that many of  
187 these proteins, including Nebulin, KLHL41, MYH1, TRIM72, ACTA1, and MYBPH are  
188 predominantly expressed in the skeletal muscle. Furthermore, based on The Human  
189 Protein Atlas and The Genotype-Tissue Expression (GTEx) databases, we selected 10

190 proteins as potential marker proteins for SkM-EVs (**Figure 3A**). To confirm whether  
191 these proteins are included in EVs, C2C12-MT-EVs were isolated by the previously  
192 defined Tim4-based method (27) and subjected to immunoblot analysis. Due to the  
193 availability and/or validity of antibodies, six out of ten proteins were analyzed. The results  
194 show that in addition to the typical exosome marker proteins (Alix, Annexin A1, CD81,  
195 and Flotillin-1), C2C12-MT-EVs contain the skeletal muscle proteins, ATP2A1,  $\beta$ -  
196 enolase, calsequestrin 2, caveolin-3, and desmin (**Figure 3B**), validating our proteomic  
197 analysis. Among them, ATP2A1,  $\beta$ -enolase, and desmin are predominantly expressed in  
198 skeletal muscle tissues (**Figure S3**).

199

### 200 ***SkM-EVs accumulate in the skeletal muscle interstitium***

201 Recent reports showed that apart from plasma, the interstitium of tissues such as  
202 the liver and lung contain significant amounts of EVs (28). To determine whether the  
203 skeletal muscle cells release EVs *in vivo*, we isolated EVs from both plasma and skeletal  
204 muscle (tibialis anterior, gastrocnemius, soleus, and quadriceps) interstitium of mice  
205 using the Tim4-based method (**Figure 4A**). We validated the quality of isolated EVs by  
206 TEM and confirmed that EVs from both the plasma and skeletal muscle interstitium show  
207 similar morphology (**Figure 4B**). Plasma and SkM-interstitium EVs were similar in size,  
208 ranging from 30–150 nm (**Figure 4C**). Scanning electron microscopy (SEM) analysis  
209 showed that the skeletal muscle interstitium contains EV-like vesicles with a diameter of  
210 50–500 nm, which are attached to extracellular matrix (ECM)-like structures (**Figure 4D**).  
211 We next examined whether these EVs contain SkM-EV markers identified above. As  
212 expected, the typical EV marker protein Alix and CD81 were found in both plasma and  
213 SkM-interstitium EVs (**Figure 4E**). In addition, SkM-EV marker proteins were detected at  
214 high levels in the SkM-interstitium EVs. In contrast, the SkM-EV markers were much less  
215 or undetectable in the plasma EVs. ATP2A1 and desmin were slightly detected in  
216 plasma EVs, suggesting that SkM-EVs only partly enter the bloodstream. These results  
217 indicate that SkM-EVs are highly concentrated in skeletal muscle tissues but are not  
218 major populations in the circulation.

219 To further determine the physiological importance of SkM-EVs *in vivo*, we  
220 examined the effect of exercise on SkM-EVs. Whether exercise increases circulating EV  
221 contents is currently controversial (29-31). Moreover, even though exercise increases  
222 circulating EVs, their origin(s) is not fully characterized. We took advantage of our newly

223 identified SkM-EV marker proteins to clarify this issue. After mice were subjected to  
224 exhaustive endurance running on a treadmill (**Figure S4A, B**), we immediately harvested  
225 blood from the heart and skeletal muscle tissues from a hind limb, and prepared plasma  
226 EVs and SkM-interstitium EVs, respectively. The results showed that exercise does not  
227 alter protein contents in either plasma EVs (Ctrl:  $340.3 \pm 22.5$  mg/mL; Exercise:  $328.4 \pm$   
228  $8.0$  mg/mL;  $p = 0.30$ ) or SkM-interstitium EVs (Ctrl:  $371.4 \pm 19.5$  mg/mL; Exercise:  $378.7$   
229  $\pm 23.6$  mg/mL;  $p = 0.35$ ). We also assessed levels of marker proteins in plasma and the  
230 interstitium EVs. Neither typical EV markers nor SkM-EV markers were not changed by  
231 exercise in plasma and the interstitium EVs (**Figure 5A, B**). Exercise did not influence  
232 the expression of SkM-EV marker proteins in the skeletal muscle (**Figure S4C**). These  
233 results suggest that exercise does not influence EV release from the skeletal muscle.  
234 Meanwhile, we observed positive correlations between CD81 and  $\beta$ -enolase, caveolin-3,  
235 or ATP2A1 contained in the interstitium EVs (**Figure 5C, Table S3**). It could be  
236 consistent with previous studies that skeletal muscle cells preferentially release CD81-  
237 positive EVs (12, 13). Furthermore, we noticed subtle but significant increases in the size  
238 of the interstitium EVs but not of plasma EVs upon exercise (**Figure 5D, E**). Together,  
239 our results show that the skeletal muscle releases EVs with a distinct protein signature  
240 and that SkM-EVs highly accumulate in the interstitium. Our results also reveal that SkM-  
241 EVs do not account for the major proportion of circulating EVs.

242

### 243 ***SkM-interstitium EVs are rich in myomiRs and promote myoblast differentiation***

244 EVs are characterized as the vehicle for miRNAs. Therefore, we finally  
245 investigated myomiR profiles of SkM-interstitium EVs and plasma EVs. The results show  
246 that all the four miRNAs (miRs-1, -206, -431, and -486) abundantly expressed in the  
247 muscle are markedly concentrated in the interstitium EVs (**Figure 6A**). In particular, miR-  
248 1 and miR-206 in the interstitium EVs were 45- and 20-fold higher than those in plasma  
249 EVs, respectively, confirming the intramuscular accumulation of SkM-EV detected by  
250 our protein-based analysis. Together, these results demonstrate that SkM-interstitium  
251 EVs display unique protein and miRNA profiles that are distinct from plasma EVs.  
252 MyomiRs play important roles in skeletal muscle homeostasis, including the regulation of  
253 myogenesis by targeting the paired box transcription factor Pax7, a master regulator for  
254 myogenesis (32-34). Our results led us to hypothesize that SkM-EVs predominantly play  
255 their roles within the intramuscular microenvironment. To test this, we asked whether



256 SkM-interstitium EVs isolated from mice modulate the expression of genes involved in  
257 myogenesis. **Figure 6B** shows that C2C12 myoblasts uptake the interstitium EVs,  
258 suggesting that SkM-EVs function in these cells. We next determined mRNA levels that  
259 regulate myoblast differentiation. The results show that the interstitium EVs suppress  
260 *Pax7* expression but increase *MyHC* expression, a marker for myoblast differentiation  
261 (**Figure 6C**). Although the downregulation of *Pax7* by interstitium EVs was not as robust  
262 as overexpression of myomiRs in myoblasts, our results were largely consistent with  
263 previous studies showing the repression of *Pax7* mRNA expression by myomiRs (32-  
264 34). The current results thus suggest that SkM-interstitium EVs regulate myogenesis at  
265 least in part by suppressing *Pax7* expression within the muscle microenvironment  
266 (**Figure 6D**).

267

## 268 Discussion

269 Circulating EVs are derived from various sources. For identification of their origin,  
270 it is essential to determine tissue-specific EV marker molecules. Proteomic approaches  
271 have been taken to search tissue-specific EV markers using cell culture models,  
272 including skeletal muscle cells (13, 15), hepatocytes (35), and adipocytes (36). Although  
273 these studies identified potential tissue-specific EV marker proteins, their validity *in*  
274 *vivo* has been poorly characterized. Accordingly, much less is known about the dynamic  
275 movement of EVs in the body. In this work, we sought to identify marker proteins that  
276 help characterize EVs derived from the skeletal muscle both in humans and mice. We  
277 first determined proteomic profiles of EVs released from C2C12 myoblasts, C2C12  
278 myotubes, and hiPSC-myocytes and identified several proteins that serve as potential  
279 markers for SkM-EVs. We then demonstrated that these marker proteins are relevant to  
280 identifying SkM-EVs *in vivo*. Finally, we showed that SkM-EVs accumulate within the  
281 muscle microenvironment where they regulate gene expression, rather than enter the  
282 blood circulation.

283 In addition to myokines secreted upon exercise, exercise-induced EVs are  
284 expected to exert health benefits (37, 38). A recent work showed that SkM-EVs from  
285 trained mice contain higher levels of miR-133b, which suppresses FoxO1 expression in  
286 the liver and improves insulin sensitivity (28). On the other hand, it was shown that the  
287 skeletal muscle is not the major source of exercise-induced EVs (22). It is thus important  
288 to identify the nature of exercise-induced EVs, including their components and origins.

289 Attempts have been made to identify markers for SkM-EVs, yet any defined markers  
290 applicable to *in vivo* analysis have not been determined at present. Several studies have  
291 reported potential markers for SkM-EVs. It was suggested that  $\alpha$ -sarcoglycan (SGCA)-  
292 positive EVs present in the plasma are derived from the skeletal muscle (39). In contrast,  
293 other studies failed to detect SGCA-positive EVs in human subjects either before or after  
294 exercise training (22). Furthermore, SGCA is not exclusively expressed in the skeletal  
295 muscle but also expressed in other tissues, including the heart, smooth muscle, and  
296 lung. In addition, although myomiRs are found in both human and mouse plasma EVs  
297 (16), a recent work demonstrates that adipose tissue is a major source of circulating  
298 exosomal miRNAs (40). These reports suggest that skeletal muscle makes only a subtle  
299 contribution to circulating EV and miRNA levels quantitatively. Meanwhile, these  
300 contrasting findings indicate the lack of consensus on how SkM-EVs behave after  
301 secretion and the difficulty in tracking SkM-EVs *in vivo*.

302 Our current analyses on proteomic profiling of human and mouse skeletal muscle  
303 cell-derived EVs combined with *in vivo* validation provide more reliable markers for SkM-  
304 EVs. Among proteins predominantly expressed in the skeletal muscle, we showed that  
305 ATP2A1,  $\beta$ -enolase, and desmin may serve as reliable SkM-EV marker proteins. By  
306 monitoring these marker proteins, we investigated whether SkM-EVs account for a  
307 significant proportion of circulating EVs and whether exercise increases SkM-EVs *in*  
308 *vivo*. Unexpectedly, SkM-EVs marker proteins were hardly detected in the plasma even  
309 after exercise. Consistent with this observation, our exosomal miRNA analysis showed  
310 that myomiR levels in plasma EVs are only subtle compared to those in interstitium EVs.  
311 These results could be consistent with previous reports showing that SGCA-positive EVs  
312 constitute only 1–5 % of total circulating EVs (39) and that most circulating exosomal  
313 miRNA are derived from adipose tissue (40). Our results are also supported by evidence  
314 that exercise-induced EVs are derived from leukocytes, platelets, and endothelial cells  
315 (22) and that treadmill running does not influence muscle-specific miRNA levels in serum  
316 (41). In contrast, we found that SkM-EVs are highly accumulated in the skeletal muscle  
317 interstitium. All these results support our view that the skeletal muscle is not the major  
318 source of circulating EVs regardless of physical activities and that SkM-EVs dominantly  
319 play a role within the tissue, not at systemic levels (**Figure 6D**).

320 What is the role of SkM-EVs in the muscle microenvironment? Our data  
321 disclosed that SkM-interstitium EVs contain myomiRs at very high levels. The myomiRs

322 we found in the interstitium EVs serve as negative regulators of Pax7, leading to  
323 myoblast differentiation (32-34). We showed that SkM-interstitium EVs isolated from  
324 mice suppress *Pax7* gene expression and up-regulate *MyHC* gene expression in murine  
325 myoblasts. We thus propose that SkM-EVs support myogenesis at least partly through  
326 myomiRs-mediated suppression of Pax7 expression. Although our data showed that only  
327 subtle amounts of SkM-EVs are found in the blood, it was reported that SkM-interstitium  
328 EVs modulate hepatic gene expression when added in cultured hepatocytes or injected  
329 intravenously in mice (28). Whether sufficient amounts of SkM-EVs are delivered to  
330 other tissues through the circulation for regulating the physiological states of recipient  
331 tissues/cells may need further investigation.

332 In summary, we revealed the distinct protein and miRNA profiles of SkM-EVs *in*  
333 *vivo*. Tracking SkM-EV markers led us to conclude that SkM-EVs do not account for the  
334 major population of circulating EVs although the skeletal muscle is the largest tissue in  
335 the body. Rather, we showed that SkM-EVs highly accumulate within the skeletal muscle  
336 microenvironment where they regulate gene expression to promote myogenesis at least  
337 partially through myomiRs.

338

## 339 **Materials and Methods**

### 340 **Materials**

341 Fetal bovine serum (FBS) and horse serum (HS) were obtained from Gibco. FBS  
342 and HS were heat-inactivated before use. EV-free FBS and HS were prepared as  
343 described (23). Briefly, FBS and HS were spun at 2,000 *g* for 10 min followed by  
344 centrifugation at 100,000 *g* for 70 min. The supernatant was further centrifuged at  
345 100,000 *g* for 16 h. The supernatant was filtrated with a 0.20  $\mu$ m filter (Advantec) and  
346 used as EV-free FBS or HS. EV-free FBS and HS were stored at -80 °C until use.

347

### 348 **Cell culture**

349 C2C12 mouse myoblasts (obtained from ATCC) were maintained at low cell  
350 density in growth medium (DMEM supplemented with 10% FBS). For differentiation to  
351 myotubes, C2C12 myoblasts were seeded into a 6-well plate at a density of  $1.5 \times 10^5$   
352 cells per well and grown for 2 days in a growth medium. Afterward, cells were incubated  
353 for 4 days in a differentiation medium (DMEM supplemented with 2% HS). The medium  
354 was changed every other day. For isolation of EVs, cells were incubated in 2% EV-free

355 HS for 48 h. Human iPS cell (hiPSC) lines, 414C2<sup>tet-Myo-D</sup> and 409B2<sup>tet-MyoD</sup> were  
356 maintained in StemFit AK02N (Ajinomoto) as described (42). These hiPSCs were  
357 differentiated into myocytes by a published protocol (42). Briefly, on day 0, hiPSCs were  
358 seeded into a Matrigel-coated 6-well plate at a density of  $3\text{--}4 \times 10^5$  cells/well and grown  
359 overnight in StemFit medium with 10  $\mu\text{M}$  Y-27632. On day 1, the medium was switched  
360 to Primate ES Cell Medium (Reprocell) containing 10  $\mu\text{M}$  Y-27632. On day 2, cells were  
361 incubated in Primate ES Cell Medium containing 1  $\mu\text{g}/\text{mL}$  doxycycline (Dox) to induce  
362 MyoD1 expression. On day 3, the medium was changed to  $\alpha\text{MEM}$  containing 5%  
363 KnockOut Serum Replacement (Gibco) and Dox (1  $\mu\text{g}/\text{mL}$ ) and incubated for 2–3 days.  
364 After differentiation, hiPSC-myocytes were incubated in DMEM containing 2% EV-free  
365 HS for 48 h to isolate EVs.

366

### 367 ***Animal studies***

368 All protocols for animal procedures were approved by the Animal Care and Use  
369 Committee of the University of Tokyo, which are based on the Law for the Humane  
370 Treatment and Management of Animals (Law No. 105, 1 October 1973, as amended on  
371 1 June 2020). C57BL/6J male mice at 8 weeks old were obtained from Japan Clea. Mice  
372 were housed in a 12 h-light/12 h-dark schedule at  $23 \pm 2^\circ\text{C}$  and  $55 \pm 10\%$  humidity and  
373 fed *ad libitum* with a standard chow diet (Labo MR Stock, Nosan Corporation) and water.  
374 Mice at 9–10 weeks old were randomly assigned to either exercise or sedentary groups.  
375 After mice were adapted to the treadmill (5 m/min for 10 min per day) for 4 days, they  
376 were subjected to exhaustion running for up to 90 min using a ramped treadmill exercise  
377 protocol starting at 10 m/min and increasing by 2 m/min every 10 min (21) using a  
378 treadmill (MK-680C, Muromachi Kikai). Mice were defined as the exhausted state when  
379 they stopped running on a treadmill for more than 5 s despite gentle encouragement.  
380 Immediately after exercise, blood was collected by cardiac puncture under anesthesia  
381 with isoflurane. Afterward, mice were perfused through the left ventricle with PBS for 2  
382 min at a rate of 1 mL/min to remove blood from the tissue, and skeletal muscle (tibialis  
383 anterior, gastrocnemius, soleus, quadriceps) and other tissues were then harvested.

384

### 385 ***Isolation of EVs from conditioned media***

386 We used two methods to isolate EVs. Method I: EVs were isolated by  
387 ultracentrifugation according to a method previously described (23). Briefly, conditioned

388 media (typically 12 mL from 6 wells) where cells were incubated in EV-free medium for  
389 48 h was spun sequentially at 300 g for 10 min, 2,000 g for 10 min and 10,000 g for 30  
390 min. After each centrifugation step, the supernatant was transferred to a new centrifuge  
391 tube. The 10,000 g-supernatant was filtered through a 0.20  $\mu$ m filter (Advantec) to obtain  
392 small EVs. Afterward, the supernatant was ultracentrifuged at 100,000 g for 70 min at  
393 4°C using an MLA-55 rotor (Beckman Coulter) and an Optima MAX-TL Ultracentrifuge  
394 (Beckman Coulter). Pellet was washed once with PBS (2 mL/tube) and EVs were  
395 pelleted by ultracentrifugation at 100,000 g for 70 min at 4°C again. Resulting pellet was  
396 resuspended in 150  $\mu$ L of PBS. Method II: The 10,000 g-supernatant was prepared as  
397 described above. After filtration and concentration with Amicon Ultra-15 (Merck), EVs  
398 were isolated using by MagCapture Exosome Isolation Kit PS (Fujifilm-Wako) according  
399 to the manufacture instruction. This method is based on the ability of Tim4 protein to  
400 bind phosphatidylserine (PS) which localizes on the exosome surface (27). In brief,  
401 medium concentrated (1 mL) as above was mixed with 0.6 mg of streptavidin magnetic  
402 beads bound to 1  $\mu$ g of biotinylated mouse Tim 4-Fc and incubated in the presence of 2  
403 mM CaCl<sub>2</sub> for 16–18 h with rotation at 4 °C. After washing beads three times with 1 mL of  
404 washing buffer (20 mM Tris-HCl pH 7.4, 150 mM NaCl, 2 mM CaCl<sub>2</sub>, 0.0005% Tween20),  
405 exosomes (EVs) were eluted twice with 50 ml of elution buffer (20 mM Tris-HCl pH 7.4,  
406 150 mM NaCl, 2 mM EDTA). EV protein contents were determined by Micro BCA Protein  
407 Assay Kit (Thermo Fisher). EVs were stored at -80 °C until use.

408

#### 409 ***Isolation of EVs from mice***

410 Plasma EVs were isolated by MagCapture Exosome Isolation Kit as above.  
411 Plasma (300  $\mu$ L) was mixed with PBS (600  $\mu$ L) and spun at 10,000 g for 30 min. After  
412 filtration of the supernatant with a 0.20  $\mu$ m filter, plasma was subjected to the isolation of  
413 EVs using MagCapture Exosome Isolation Kit with elution volume of 100  $\mu$ L per 300  $\mu$ L  
414 plasma. Skeletal muscle interstitium EVs were isolated according to a method recently  
415 reported (43, 44). Approximately 150 mg of skeletal muscle tissues (tibialis anterior,  
416 gastrocnemius, soleus, and quadriceps) from a hind limb were combined and digested  
417 with collagenase (10 mg/mL, Sigma) and dispase II (10,000 PU/mL, Wako-Fujifilm) for 1  
418 h at 37°C in HEPES buffer (100 mM HEPES, 2.5 mM CaCl<sub>2</sub>). To avoid disruption of  
419 cells, tissues were minced gently. Afterward, one volume of PBS containing 2 mM EDTA

420 was added to the sample, and the sample was passed through a 100  $\mu\text{m}$  cell strainer  
421 (Corning). Samples were then centrifuged at 600  $g$  for 5 min at 4°C, 2,000  $g$  for 10 min,  
422 and 10,000  $g$  for 30 min. The supernatant was filtrated with a 0.20  $\mu\text{m}$  filter and  
423 concentrated using Amicon Ultra-15 (Merck). EVs were then isolated by MagCapture  
424 Exosome Isolation Kit as described above. EVs were eluted with 100  $\mu\text{L}$  of elution buffer  
425 per 300 mg tissue.

426

### 427 ***Immunoblotting and antibodies***

428 Cells were lysed with urea buffer (8 M Urea, 50 mM Na-phosphate pH 8.0, 10  
429 mM Tris-HCl pH 8.0, 100 mM NaCl) containing protease inhibitor cocktail (Nacalai  
430 Tesque) as described (45). Tissue homogenates were prepared in  
431 radioimmunoprecipitation assay buffer (50 mM Tris-HCl pH 7.4, 150 mM NaCl, 1 mM  
432 EDTA, 1% Nonidet P-40, and 0.25% sodium deoxycholate) supplemented with a  
433 protease inhibitor mixture (Nacalai Tesque) and phosphatase inhibitor mixture (Sigma).  
434 Protein concentration was determined by BCA Protein Assay (Thermo Fisher). Cell  
435 lysate, tissue homogenate, and EVs were mixed with Laemmli buffer and heated at 95  
436 °C for 3 min. Aliquots were subjected to SDS-PAGE and immunoblot analysis according  
437 to a standard protocol. The expression of a protein was analyzed by Image J software or  
438 Evolution-Capt software (Vilber Lourmat). Antibodies used were obtained from  
439 commercial sources as follows: anti-caveolin 3 (sc-5310), anti-calsequestrin 1 (sc-  
440 137080), anti-calsequestrin 2 (sc-390999), anti-CD81 (sc-166029), anti- $\beta$  enolase (sc-  
441 100811), anti-HSP90 (sc-13119), anti-tsg101 (sc-7964) antibodies from Santa Cruz  
442 Biotechnology; anti-flotillin 1 antibody (ab41927) from Abcam; anti-CD81 (#10037), anti-  
443 Alix (#92880), anti-desmin (#5332), anti-ATP2A1 (#12293), anti-GAPDH (#5174), HRP-  
444 linked anti-mouse IgG (#7076), and HRP-linked anti-rabbit IgG (#7074) antibodies from  
445 Cell Signaling Technology; anti-annexin A1 mouse mAb (66344-1-Ig) from Proteintech;  
446 Mouse TrueBlot: Anti-Mouse Ig HRP (18-8817-31) from Rockland Immunochemicals.

447

### 448 ***Proteomic analysis of EVs***

449 EVs were solubilized in 50 mM Tris-HCl pH 9.0 containing 5% sodium  
450 deoxycholate, reduced with 10 mM dithiothreitol for 60 min at 37 °C, and alkylated with  
451 55 mM iodoacetamide for 30 min in the dark at 25 °C. The reduced and alkylated  
452 samples were diluted 10-fold with 50 mM Tris-HCl pH 9.0 and digested with trypsin at

453 37 °C for 16 h (trypsin-to-protein ratio of 1:20 (w/w)). An equal volume of ethyl acetate  
454 was added to each sample solution and the mixtures were acidified with the final  
455 concentration of 0.5% trifluoroacetic acid. The mixtures were shaken for 1 min and  
456 centrifuged at 15,700 g for 2 min. The aqueous phase was collected and desalted with  
457 C18-StageTips. LC-MS/MS analysis was performed using an UltiMate 3000 Nano LC  
458 system (Thermo Fisher Scientific) coupled to Orbitrap Fusion Lumos hybrid quadrupole-  
459 Orbitrap mass spectrometer (Thermo Fisher Scientific) with a nano-electrospray  
460 ionization source. The sample was injected by an autosampler and enriched on a C18  
461 reverse-phase trap column (100  $\mu$ m  $\times$  5 mm length, Thermo Fisher Scientific) at a flow  
462 rate of 4  $\mu$ L/min. The sample was subsequently separated by a C18 reverse-phase  
463 column (75  $\mu$ m  $\times$  150 mm length, Nikkyo Technos) at a flow rate of 300 nL/min with a  
464 linear gradient from 2% to 35% mobile phase B (95% acetonitrile and 0.1% formic acid).  
465 The peptides were ionized using nano-electrospray ionization in positive ion mode. The  
466 raw data were analyzed by Mascot Distiller v2.3 (Matrix Science), and peak lists were  
467 created based on the recorded fragmentation spectra. Peptides and proteins were  
468 identified by Mascot v2.3 (Matrix Science) using UniProt database with a precursor mass  
469 tolerance of 10 ppm, a fragment ion mass tolerance of 0.01 Da and strict trypsin  
470 specificity allowing for up to 1 missed cleavage. The carbamidomethylation of cysteine  
471 and the oxidation of methionine were allowed as variable modification.

472

### 473 ***Electron microscopy***

474 Specimens for transmission electron microscopy (TEM) were prepared at room  
475 temperature. An aliquot of EV sample was pipetted onto a copper grid with carbon  
476 support film and incubated for 10 min. After the excess liquid was removed, a grid was  
477 briefly placed on 10  $\mu$ L 2% uranyl acetate (w/v, Merck). Images were acquired under a  
478 JEM-1010 electron microscope (JEOL) operated at 100 kV with a Keen view CCD  
479 camera (Olympus Soft Imaging Solution). The size of EVs was measured using Image J  
480 software.

481 For scanning electron microscopy (SEM) analysis, skeletal muscle tissue  
482 (approximately 3  $\times$  3 mm in size) was fixed with 10% neutral buffered formalin for 1 h  
483 and with 0.2 % glutaraldehyde and 2% paraformaldehyde in PBS for 1 h. After post-  
484 fixation with 1 % osmium tetroxide in PBS, samples were dehydrated in ethanol series  
485 (70%, 90%, 95%, 99.5% and 100%) for 10 min each, treated with tert-butyl alcohol for 10

486 min twice and freeze-dried. The dried specimen was applied onto a carbon double side-  
487 tape with silver paste and sputter coated with platinum palladium. Images were acquired  
488 under a Hitachi S-4800 scanning electron microscope with a secondary electron in-lens  
489 detector.

490

#### 491 ***EV labeling and confocal microscopy***

492 EVs were labeled using ExoSparkler Exosome Protein Labeling Kit-Red (Dojindo  
493 Laboratories) according to the manufacturer's instruction. C2C12 myoblasts seeded in a  
494 35-mm film bottom dish (Matsunami) were incubated without or with the labeled EVs (4  
495  $\mu\text{g}$  protein per 2 mL). Cells were fixed with 4% paraformaldehyde (Fujifilm-Wako) for 10  
496 min and then permeabilized with 0.1% Triton X-100 in PBS for 5 min at room  
497 temperature. After nuclei were stained with DAPI, specimens were mounted with  
498 ProLong Gold Antifade Reagent (Thermo Fisher). Cell images were acquired by an  
499 LSM800 confocal laser microscope (Carl Zeiss) equipped with a Plan-Apochromat  
500 63x/1.4 objective. Images were processed with a Zen software (Carl Zeiss).

501

#### 502 ***mRNA expression analysis***

503 Total RNA was isolated using ISOGEN (NIPPON GENE), according to the  
504 manufacturer's instructions. The high-capacity cDNA reverse transcription kit (Applied  
505 Biosystems) was used to synthesize cDNA from total RNA. Quantitative real-time PCR  
506 (qPCR) analyses were performed using an Applied Biosystems StepOnePlus. mRNA  
507 levels were normalized to 18S ribosomal RNA levels. The primers used for qPCR  
508 analysis are described in *SI Appendix*, Table S4.

509

#### 510 ***miRNA analysis***

511 Plasma and SkM-interstitium EVs were isolated from two mice and pooled for  
512 miRNA analyses. Total RNA was extracted from EVs (20  $\mu\text{g}$  protein) using miRNeasy  
513 Mini Kit (Qiagen). RNA was then reverse-transcribed using TaqMan MicroRNA Reverse  
514 Transcription Kit (Applied Biosystems) according to the manufacturer's protocol. qPCR  
515 was then performed using TaqMan MicroRNA Assay (miR-1, Assay ID: 002222; miR-  
516 206, Assay ID: 000510; miR-431, Assay ID: 001979; miR-486, Assay ID: 002093; miR-  
517 16, Assay ID: 000391; miR-21, Assay ID: 000397) (Applied Biosystems). Exosomal  
518 miRNA levels were normalized by the mean value of miR-16 and miR-21 as described



519 (28).

520

### 521 **Statistical analysis**

522 Results are expressed as mean  $\pm$  SEM from at least three independent biological  
523 replicates. Statistical analyses were performed using the two-tailed, unpaired Student's *t*-  
524 test. *P* values less than 0.05 were considered statistically significant.

525

526

### 527 **Acknowledgments**

528 This work was supported by KAKENHI grants 19H02908 (to Y.Y.) and 20H00408  
529 (to R.S.) from the Japan Society for the Promotion of Science, and AMED-CREST grants  
530 20gm091008h and 21gm091008h (to Y.Y. and R.S.) from Japan Agency for Medical  
531 Research and Development. S.W. was supported by Japan Society for the Promotion of  
532 Science Research Fellowship for Young Scientists.

533

534

### 535 **References**

- 536 1. C. Hoffmann, C. Weigert, Skeletal Muscle as an Endocrine Organ: The Role of  
537 Myokines in Exercise Adaptations. *Cold Spring Harb Perspect Med* **7** (2017).
- 538 2. B. K. Pedersen, M. A. Febbraio, Muscles, exercise and obesity: skeletal muscle  
539 as a secretory organ. *Nat Rev Endocrinol* **8**, 457-465 (2012).
- 540 3. G. N. Ruegsegger, F. W. Booth, Health Benefits of Exercise. *Cold Spring Harb*  
541 *Perspect Med* **8** (2018).
- 542 4. G. van Niel, G. D'Angelo, G. Raposo, Shedding light on the cell biology of  
543 extracellular vesicles. *Nat Rev Mol Cell Biol* **19**, 213-228 (2018).
- 544 5. K. O'Brien, K. Breyne, S. Ughetto, L. C. Laurent, X. O. Breakefield, RNA delivery  
545 by extracellular vesicles in mammalian cells and its applications. *Nat Rev Mol*  
546 *Cell Biol* **21**, 585-606 (2020).
- 547 6. D. M. Pegtel, S. J. Gould, Exosomes. *Annu Rev Biochem* **88**, 487-514 (2019).
- 548 7. M. Mathieu, L. Martin-Jaular, G. Lavieu, C. Théry, Specificities of secretion and  
549 uptake of exosomes and other extracellular vesicles for cell-to-cell  
550 communication. *Nat Cell Biol* **21**, 9-17 (2019).
- 551 8. M. Record, S. Silvente-Poirot, M. Poirot, M. J. O. Wakelam, Extracellular

- 552 vesicles: lipids as key components of their biogenesis and functions. *J Lipid Res*  
553 **59**, 1316-1324 (2018).
- 554 9. R. Kalluri, V. S. LeBleu, The biology, function, and biomedical applications of  
555 exosomes. *Science* **367** (2020).
- 556 10. J. M. Pitt, G. Kroemer, L. Zitvogel, Extracellular vesicles: masters of intercellular  
557 communication and potential clinical interventions. *J Clin Invest* **126**, 1139-1143  
558 (2016).
- 559 11. M. A. Mori, R. G. Ludwig, R. Garcia-Martin, B. B. Brandão, C. R. Kahn,  
560 Extracellular miRNAs: From Biomarkers to Mediators of Physiology and Disease.  
561 *Cell Metab* **30**, 656-673 (2019).
- 562 12. S. Rome, A. Forterre, M. L. Mizgier, K. Bouzakri, Skeletal Muscle-Released  
563 Extracellular Vesicles: State of the Art. *Front Physiol* **10**, 929 (2019).
- 564 13. M. C. Le Bihan *et al.*, In-depth analysis of the secretome identifies three major  
565 independent secretory pathways in differentiating human myoblasts. *J*  
566 *Proteomics* **77**, 344-356 (2012).
- 567 14. M. Guescini *et al.*, C2C12 myoblasts release micro-vesicles containing mtDNA  
568 and proteins involved in signal transduction. *Exp Cell Res* **316**, 1977-1984  
569 (2010).
- 570 15. A. Forterre *et al.*, Proteomic analysis of C2C12 myoblast and myotube exosome-  
571 like vesicles: a new paradigm for myoblast-myotube cross talk? *PLoS One* **9**,  
572 e84153 (2014).
- 573 16. Y. Matsuzaka *et al.*, Characterization and Functional Analysis of Extracellular  
574 Vesicles and Muscle-Abundant miRNAs (miR-1, miR-133a, and miR-206) in  
575 C2C12 Myocytes and mdx Mice. *PLoS One* **11**, e0167811 (2016).
- 576 17. A. Forterre *et al.*, Myotube-derived exosomal miRNAs downregulate Sirtuin1 in  
577 myoblasts during muscle cell differentiation. *Cell Cycle* **13**, 78-89 (2014).
- 578 18. E. Giagnorio, C. Malacarne, R. Mantegazza, S. Bonanno, S. Marcuzzo, MyomiRs  
579 and their multifaceted regulatory roles in muscle homeostasis and amyotrophic  
580 lateral sclerosis. *J Cell Sci* **134** (2021).
- 581 19. M. Horak, J. Novak, J. Bienertova-Vasku, Muscle-specific microRNAs in skeletal  
582 muscle development. *Dev Biol* **410**, 1-13 (2016).
- 583 20. C. Frühbeis, S. Helmig, S. Tug, P. Simon, E. M. Krämer-Albers, Physical  
584 exercise induces rapid release of small extracellular vesicles into the circulation.

- 585            *J Extracell Vesicles* **4**, 28239 (2015).
- 586        21. M. Whitham *et al.*, Extracellular Vesicles Provide a Means for Tissue Crosstalk  
587            during Exercise. *Cell Metab* **27**, 237-251 e234 (2018).
- 588        22. A. Brahmer *et al.*, Platelets, endothelial cells and leukocytes contribute to the  
589            exercise-triggered release of extracellular vesicles into the circulation. *J Extracell*  
590            *Vesicles* **8**, 1615820 (2019).
- 591        23. C. Thery, S. Amigorena, G. Raposo, A. Clayton, Isolation and characterization of  
592            exosomes from cell culture supernatants and biological fluids. *Curr Protoc Cell*  
593            *Biol* **Chapter 3**, Unit 3 22 (2006).
- 594        24. M. Pathan *et al.*, Vesiclepedia 2019: a compendium of RNA, proteins, lipids and  
595            metabolites in extracellular vesicles. *Nucleic Acids Res* **47**, D516-D519 (2019).
- 596        25. D. W. Huang, B. T. Sherman, R. A. Lempicki, Systematic and integrative analysis  
597            of large gene lists using DAVID bioinformatics resources. *Nat Protoc* **4**, 44-57  
598            (2009).
- 599        26. D. W. Huang, B. T. Sherman, R. A. Lempicki, Bioinformatics enrichment tools:  
600            paths toward the comprehensive functional analysis of large gene lists. *Nucleic*  
601            *Acids Res* **37**, 1-13 (2009).
- 602        27. W. Nakai *et al.*, A novel affinity-based method for the isolation of highly purified  
603            extracellular vesicles. *Sci Rep* **6**, 33935 (2016).
- 604        28. C. Castano, M. Mirasierra, M. Vallejo, A. Novials, M. Parrizas, Delivery of  
605            muscle-derived exosomal miRNAs induced by HIIT improves insulin sensitivity  
606            through down-regulation of hepatic FoxO1 in mice. *Proc Natl Acad Sci U S A*  
607            **117**, 30335-30343 (2020).
- 608        29. G. P. Oliveira *et al.*, Effects of Acute Aerobic Exercise on Rats Serum  
609            Extracellular Vesicles Diameter, Concentration and Small RNAs Content. *Front*  
610            *Physiol* **9**, 532 (2018).
- 611        30. J. A. C. Lovett, P. J. Durcan, K. H. Myburgh, Investigation of Circulating  
612            Extracellular Vesicle MicroRNA Following Two Consecutive Bouts of Muscle-  
613            Damaging Exercise. *Front Physiol* **9**, 1149 (2018).
- 614        31. A. E. Rigamonti *et al.*, Effects of an acute bout of exercise on circulating  
615            extracellular vesicles: tissue-, sex-, and BMI-related differences. *Int J Obes*  
616            (*Lond*) **44**, 1108-1118 (2020).
- 617        32. J. F. Chen *et al.*, microRNA-1 and microRNA-206 regulate skeletal muscle

- 618 satellite cell proliferation and differentiation by repressing Pax7. *J Cell Biol* **190**,  
619 867-879 (2010).
- 620 33. B. K. Dey, J. Gagan, A. Dutta, miR-206 and -486 induce myoblast differentiation  
621 by downregulating Pax7. *Mol Cell Biol* **31**, 203-214 (2011).
- 622 34. R. Wu *et al.*, MicroRNA-431 accelerates muscle regeneration and ameliorates  
623 muscular dystrophy by targeting Pax7 in mice. *Nat Commun* **6**, 7713 (2015).
- 624 35. J. Conde-Vancells *et al.*, Characterization and comprehensive proteome profiling  
625 of exosomes secreted by hepatocytes. *J Proteome Res* **7**, 5157-5166 (2008).
- 626 36. M. Durcin *et al.*, Characterisation of adipocyte-derived extracellular vesicle  
627 subtypes identifies distinct protein and lipid signatures for large and small  
628 extracellular vesicles. *J Extracell Vesicles* **6**, 1305677 (2017).
- 629 37. A. Safdar, A. Saleem, M. A. Tarnopolsky, The potential of endurance exercise-  
630 derived exosomes to treat metabolic diseases. *Nat Rev Endocrinol* **12**, 504-517  
631 (2016).
- 632 38. I. J. Vechetti, T. Valentino, C. B. Mobley, J. J. McCarthy, The role of extracellular  
633 vesicles in skeletal muscle and systematic adaptation to exercise. *J Physiol* **599**,  
634 845-861 (2021).
- 635 39. M. Guescini *et al.*, Muscle Releases Alpha-Sarcoglycan Positive Extracellular  
636 Vesicles Carrying miRNAs in the Bloodstream. *PLoS One* **10**, e0125094 (2015).
- 637 40. T. Thomou *et al.*, Adipose-derived circulating miRNAs regulate gene expression  
638 in other tissues. *Nature* **542**, 450-455 (2017).
- 639 41. H. Mizuno *et al.*, Identification of muscle-specific microRNAs in serum of  
640 muscular dystrophy animal models: promising novel blood-based markers for  
641 muscular dystrophy. *PLoS One* **6**, e18388 (2011).
- 642 42. T. Uchimura, J. Otomo, M. Sato, H. Sakurai, A human iPS cell myogenic  
643 differentiation system permitting high-throughput drug screening. *Stem Cell Res*  
644 **25**, 98-106 (2017).
- 645 43. C. Crewe *et al.*, An Endothelial-to-Adipocyte Extracellular Vesicle Axis Governed  
646 by Metabolic State. *Cell* **175**, 695-708.e613 (2018).
- 647 44. R. Crescitelli, C. Lässer, J. Lötval, Isolation and characterization of extracellular  
648 vesicle subpopulations from tissues. *Nat Protoc* **16**, 1548-1580 (2021).
- 649 45. Y. Yamauchi, K. Furukawa, K. Hamamura, Positive feedback loop between PI3K-  
650 Akt-mTORC1 signaling and the lipogenic pathway boosts Akt signaling: induction

651 of the lipogenic pathway by a melanoma antigen. *Cancer Res* **71**, 4989-4997  
652 (2011).  
653

654 **Figures**

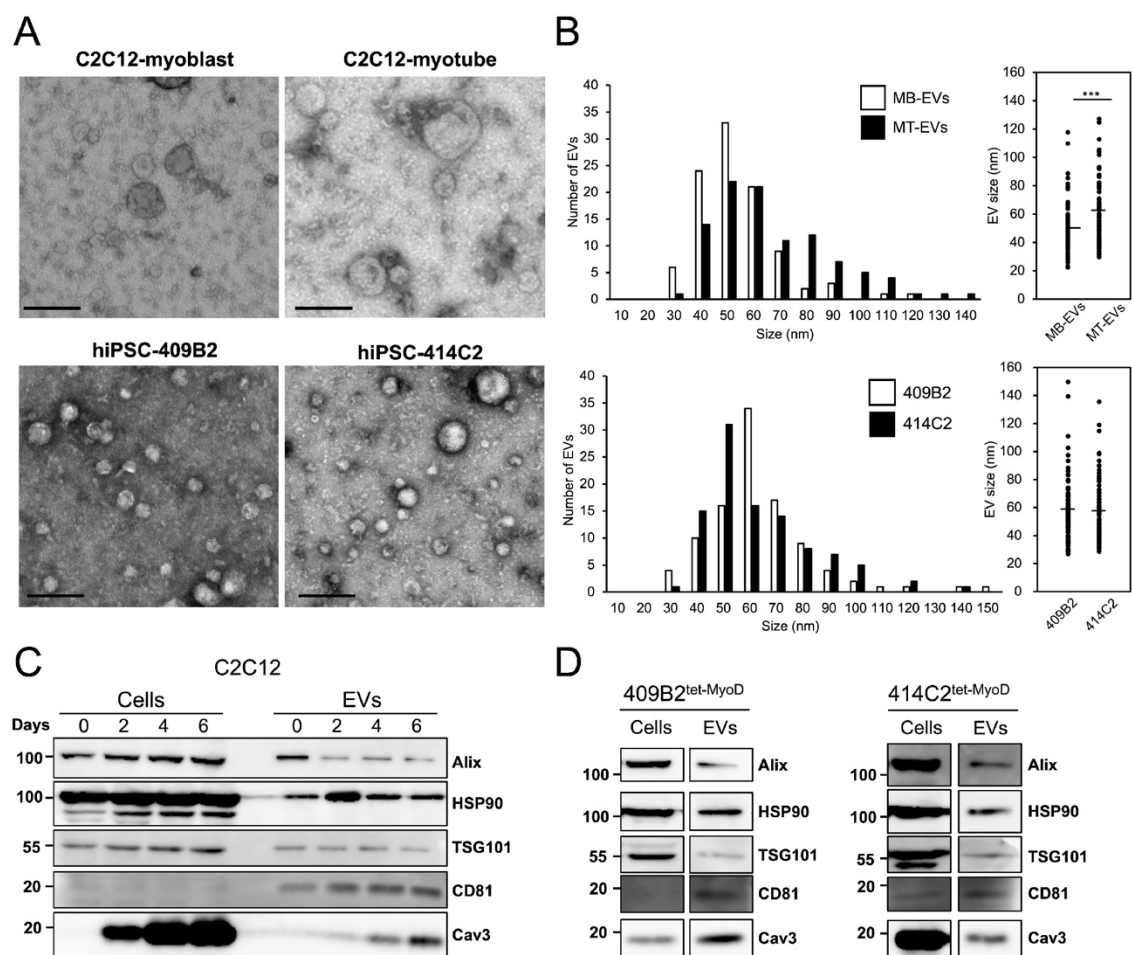

655

656

657 **Figure 1. Isolation and characterization of EVs from cultured human and mouse**  
 658 **myocytes.**

659 **(A)** TEM images of EVs. EVs were isolated from C2C12 myoblasts, C2C12 myotubes,  
 660 and two lines of hiPSC-myocytes (409B2<sup>tet-MyoD</sup> and 414C2<sup>tet-MyoD</sup>) and images were  
 661 acquired under TEM. Scale bar, 100 nm. **(B)** Size distribution of EVs. Sizes of EVs from  
 662 C2C12-MB-EVs, C2C12-MT-EVs (top), and hiPS-MC-EVs (bottom) were measured  
 663 using TEM images. Statistical analysis was performed by Student's *t*-test. \*\*\*, *P* < 0.005  
 664 (*n* = 100). **(C)** Differentiation-dependent expression of proteins in C2C12 cells and  
 665 C2C12-derived EVs. Cell lysates and EVs were prepared on days 0, 2, 4, 6. Forty-eight  
 666 hours before harvest, medium was switched to EV-free medium. EVs were isolated from  
 667 conditioned medium by ultracentrifugation as described in the Materials and Methods.

668 Expression of EV marker proteins in cell lysate (20  $\mu$ g protein) and EVs (1  $\mu$ g protein)  
669 was analyzed by immunoblot. **(D)** Protein expression in hiPSC-myocytes and their EVs.  
670 hiPSCs (409B2<sup>tet-MyoD</sup> and 414C2<sup>tet-MyoD</sup>) were differentiated into myocytes. Afterward,  
671 myocytes were incubated for 48 h in medium containing 5% EV-free HS. EVs were  
672 isolated from conditioned medium by ultracentrifugation. Cell lysate (20  $\mu$ g protein) and  
673 EVs (1  $\mu$ g protein) were subjected to immunoblotting to analyze the expression of the  
674 indicated proteins.  
675

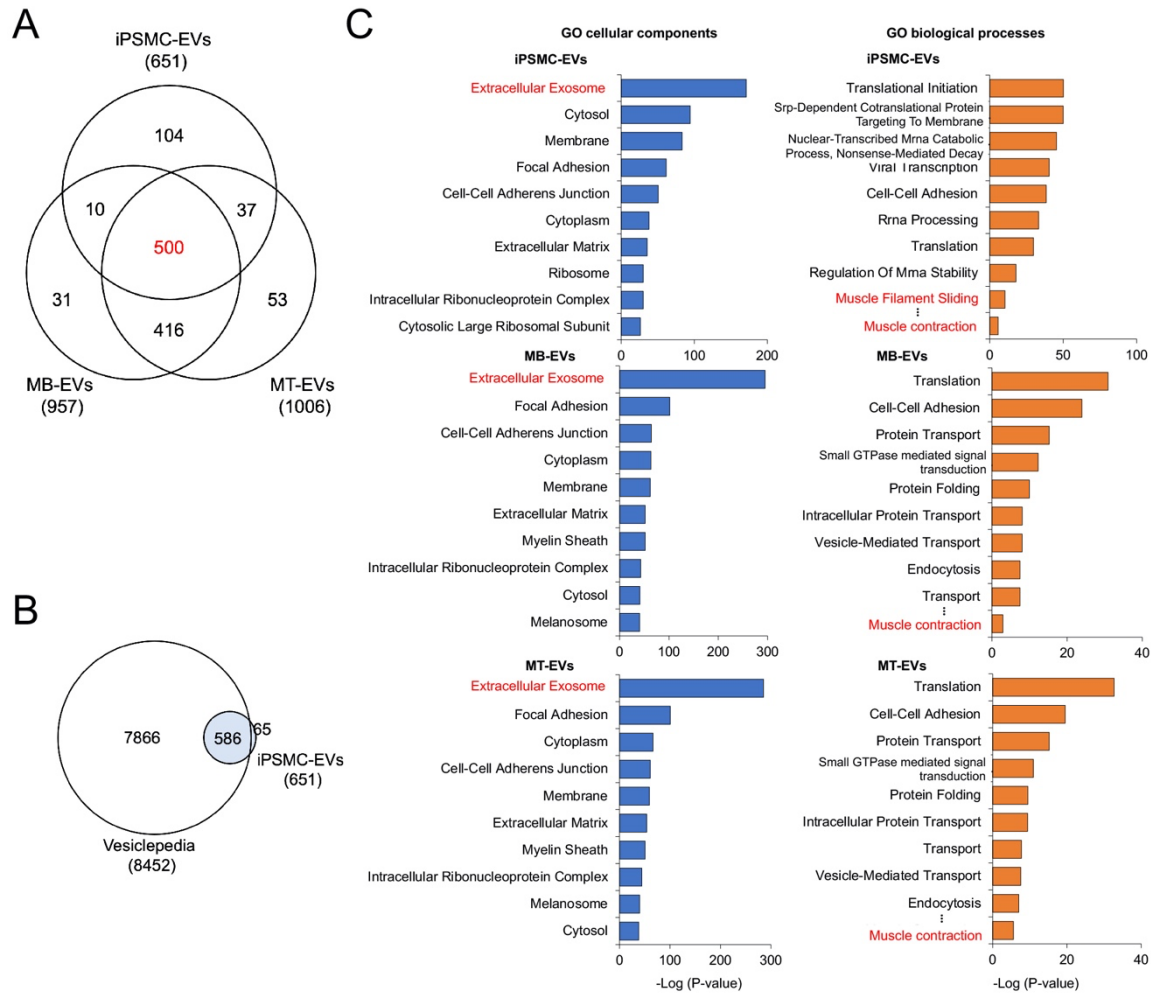

676

677 **Figure 2. Proteomic profiling of myocyte-derived EVs.**

678 (A) Venn diagram showing the distinct and overlapping EV proteins from C2C12  
 679 myoblasts, C2C12 myotubes, and hiPSC-myocytes. Proteomic analyses were performed  
 680 on EVs isolated from C2C12 myoblasts (MB-EVs), C2C12 myotubes (MT-EVs), and  
 681 hiPSC-myocytes (iPSMC-EVs). The 651 proteins in the iPSMC-EVs are derived from  
 682 EVs isolated from both 414C2<sup>tet-Myo-D</sup> or 409B2<sup>tet-MyoD</sup>. (B) Venn diagram showing  
 683 proteomic coverage of hiPS-MC-EVs versus Vesiclopedia database. (C) GO analysis of  
 684 myocyte-derived EVs for cellular components (*left*) and biological processes (*right*).  
 685 Proteomic data on iPS-MC-EVs (*top*), C2C12-MB-EVs (*middle*), and C2C12-MT-EVs  
 686 (*bottom*) were analyzed using DAVID. Top 10 GO term are listed.

687



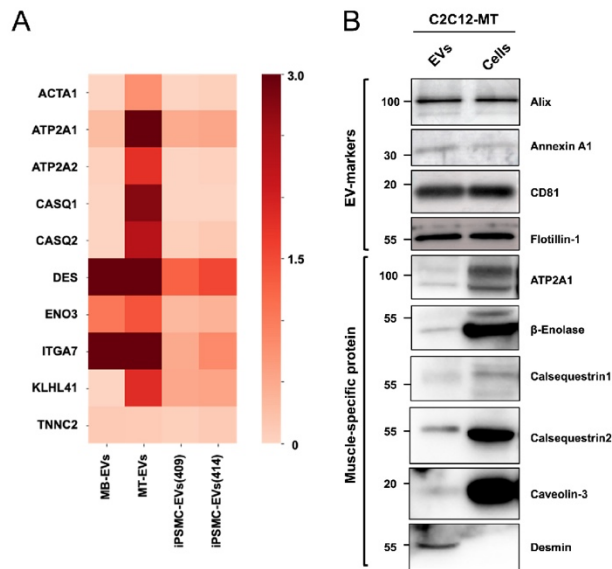

688

689

690 **Figure 3. Identification of potential SkM-EV markers *in vitro*.**

691 (A) Heatmap showing the contents of potential SkM-EV marker in isolated EVs. The  
692 contents of the ten muscle-specific proteins in C2C12-MB-EVs (MB-EVs), and C2C12-  
693 MT-EVs (MT-EVs), and hiPS-MC-EVs (iPSMC409-EVs and iPSMC414-EVs) are shown.  
694 (B) Expression of EV-marker proteins in C2C12-MT-EVs. EVs and cell lysate were  
695 prepared using PS-affinity beads and urea buffer, respectively. The expressions of  
696 typical EV marker proteins and muscle-specific proteins in EVs and cells were analyzed  
697 by immunoblot.

698

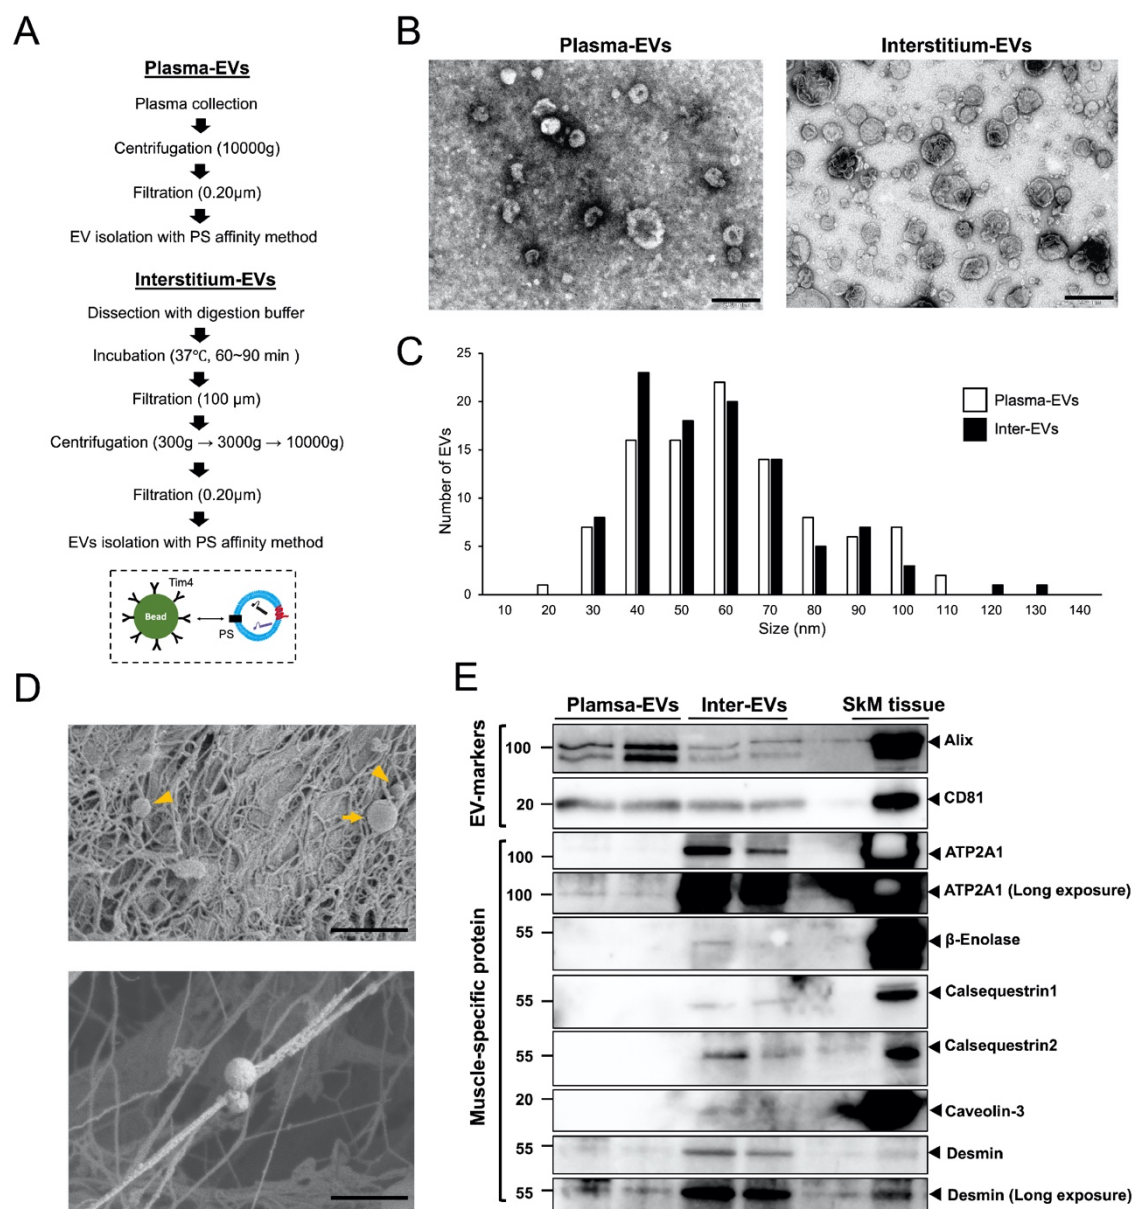

699

700 **Figure 4. Validation of SkM-EVs markers *in vivo*.**

701 (A) Outlines of EV isolation protocols from plasma and the skeletal muscle interstitium.

702 See the Material and Methods for more detail. (B) TEM images of plasma and

703 interstitium EVs. Scale bar, 200 nm. (C) Size distribution of plasma and interstitium EVs.

704 Size of EVs were analyzed using Image J. (D) SEM images of skeletal muscle tissue

705 (gastrocnemius). Small and large EVs are indicated arrowheads and arrows,

706 respectively. The bottom image shows small EVs attaching ECM-like structures. Scale

707 bar, 1 µm in upper panel and 500 nm in lower panel. (E) Expression of the EV marker

708 proteins in plasma and interstitium EVs. Plasma and interstitium EVs were isolated from  
709 two mice as in (A). Skeletal muscle tissue (quadriceps) homogenates were also  
710 prepared from the same mice. Plasma EVs (5  $\mu$ g protein/lane) and interstitium EVs  
711 (Inter-EVs) (5  $\mu$ g protein/lane) were subjected to immunoblot analysis to validate the  
712 presence of the marker proteins in these EVs. SkM tissue homogenates (2  $\mu$ g  
713 protein/lane) were also analyzed as positive controls.  
714

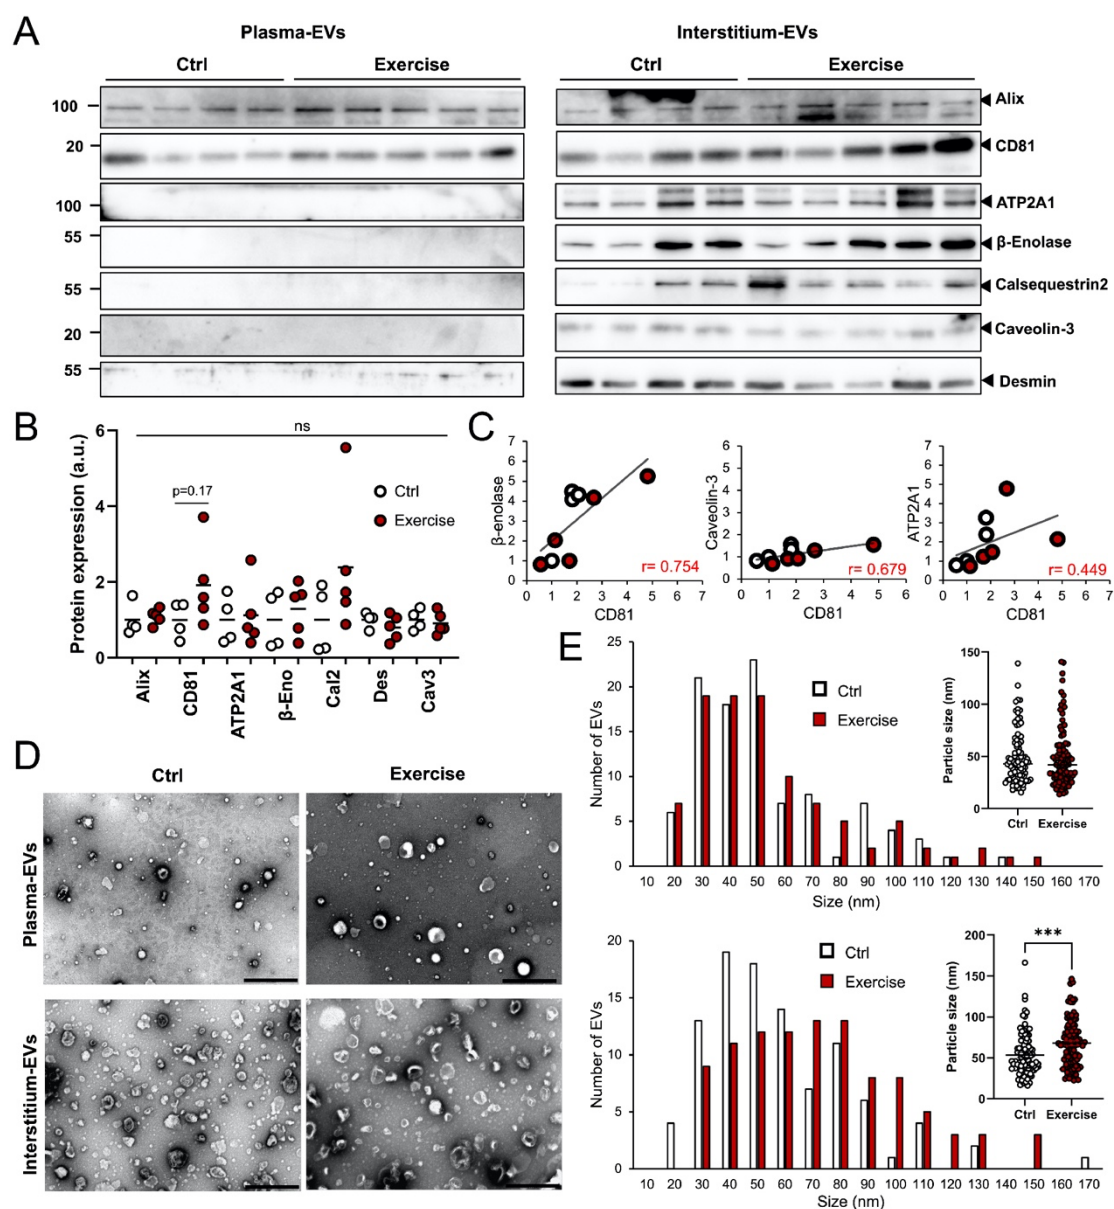

715

716 **Figure 5. Effect of exercise on plasma and SkM interstitium EVs.**

717 (A) Immunoblot analysis of EVs. Plasma and skeletal muscle interstitium EVs were  
 718 isolated from control (n = 4) and exercised mice (n = 5). Equal volume of plasma EVs  
 719 (20 μL/lane, equivalent to EVs from 60 μL plasma) and interstitium EVs (20 μL/lane,  
 720 equivalent to EVs from 60 mg tissue) were subjected to immunoblotting to detect the  
 721 indicated proteins. Expression of these proteins in skeletal muscle tissues with or without  
 722 exercise are shown in Figure S4C. (B) Quantification of protein levels in interstitium EVs  
 723 before and after exercise. (C) Correlation between CD81 and SkM-EV marker proteins

724 ( $\beta$ -enolase, caveolin-3, and ATP2A1). Each circle represents individual mice with (red  
725 circle) or without (white circle) exercise. **(D)** TEM images of plasma and interstitium EVs  
726 with or without exercise. Scale bar, 500 nm. **(E)** Size distribution of plasma (*upper*) and  
727 interstitium (*lower*) EVs isolated from mice with or without exercise. Statistical analysis  
728 was performed by Student's *t*-test. \*\*\*,  $P < 0.005$  ( $n = 100$ ).  
729

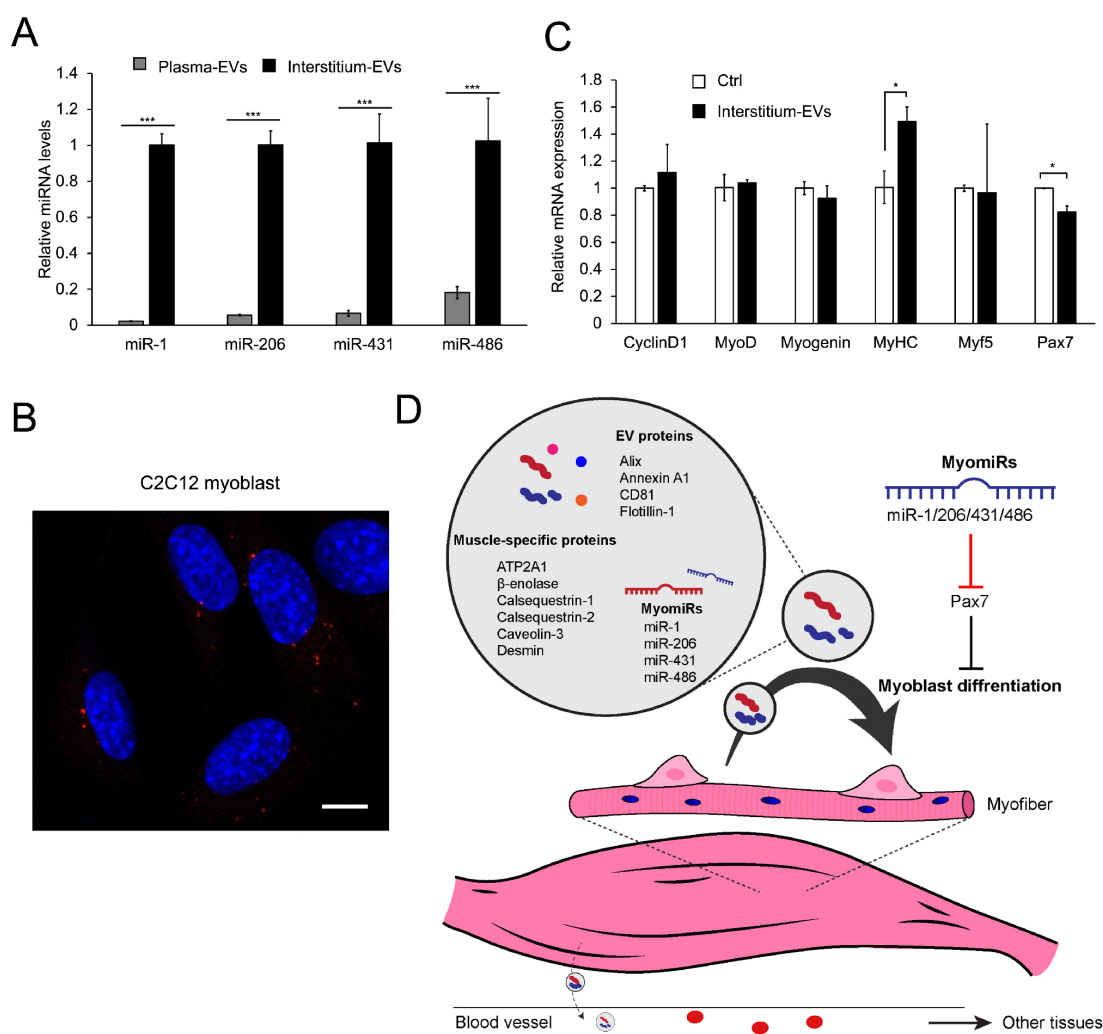

730

731 **Figure 6. EVs uptake and functional analysis of SkM-Interstitial EVs.**

732 (A) Exosomal miRNAs. Levels of miRs-1, -206, -431, and -486 in plasma and interstitium

733 EVs were determined by qPCR as described in Materials and Methods. (B) Uptake of

734 interstitium EVs by myoblasts. C2C12 myoblasts were incubated with labeled-interstitium

735 EVs (4 μg protein/well, red) for 6 h. After fixation, permeabilization, and nucleus staining

736 with DAPI (blue), cell images were acquired by a confocal microscopy. Bar, 10 μm. (C)

737 Effect of interstitium EVs on gene expression in myoblasts. C2C12 myoblasts were

738 incubated with interstitium EVs (4 μg protein/well) in growth medium for 24 h. mRNA

739 levels of the indicated genes were analyzed by qPCR. Results are shown as mean ±

740 SEM ( $n = 3$ ). Statistical analysis was performed by Student's *t*-test. \*  $P < 0.05$ , \*\*  $P <$

741 0.01, \*\*\*  $P < 0.01$ . (D) A model depicting the role of SkM-EVs. See text for more detail.
